# Supplementary material for: Spectral- and Image-Based Metrics for Evaluating Cleaning Tests on Unvarnished Painted Surfaces
Source: Preprints.org preprint supplement (doi:10.20944/preprints202407.0896.v1), 2024-07-11
Supplement: Supplementary file 1 [file supplementary]

Supplementary Materials: Spectral- and image-based metrics for evaluating cleaning tests on unvarnished painted surfaces

Jan Dariusz Cutajar 1,*, Calin Constantin Steindal 2, Francesco Caruso 3,4, Edith Joseph 5,6 and Tine Frøysaker 1

1 Conservation Studies, University of Oslo, Norway; j.d.cutajar@iakh.uio.no; tine.froysaker@iakh.uio.no

2 Cultural History Museum, University of Oslo, Norway; c.c.steindal@khm.uio.no

3 Department of Art Technology, Swiss Institute for Art Research (SIK-ISEA), Zurich, Switzerland;

4 Department of Analytical Chemistry, University of the Basque Country UPV/EHU, Vitoria-Gasteiz, Spain; francesco.caruso@ehu.eus

5 Haute École Art Conservation-Restoration (HE-Arc CR), Haute École Spécialisée de Suisse Occidentale (HES-SO), Switzerland; edith.joseph@he-arc.ch

6 Laboratory of Technologies for Heritage Materials, University of Neuchâtel, Switzerland;

***** Correspondence: jd_c@outlook.com

1. VNIR- and SWIR-HSI soiling maps.


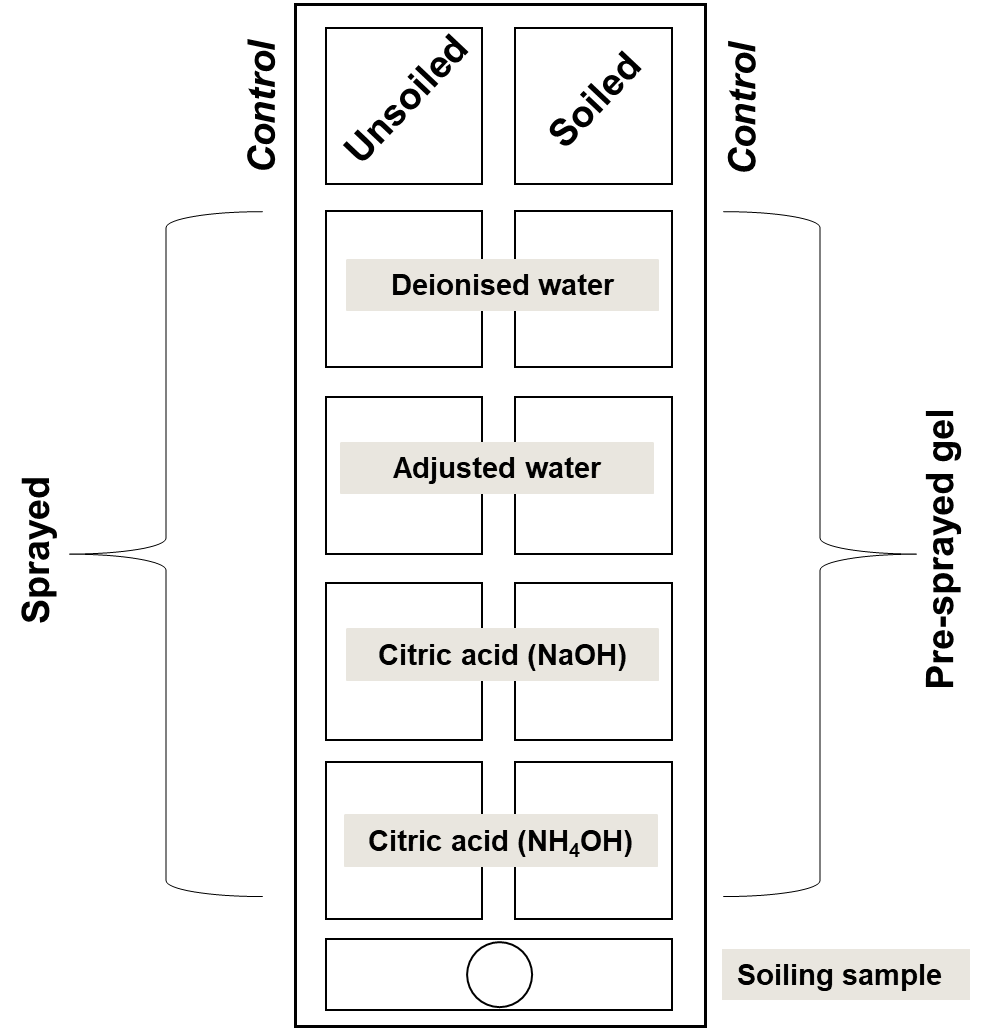


**Figure S1: Legend to interpreting the spectral unmixing maps presented in this work.**

1.1. chalk-glue ground

1.1.1. supervised unmixing • vnir range


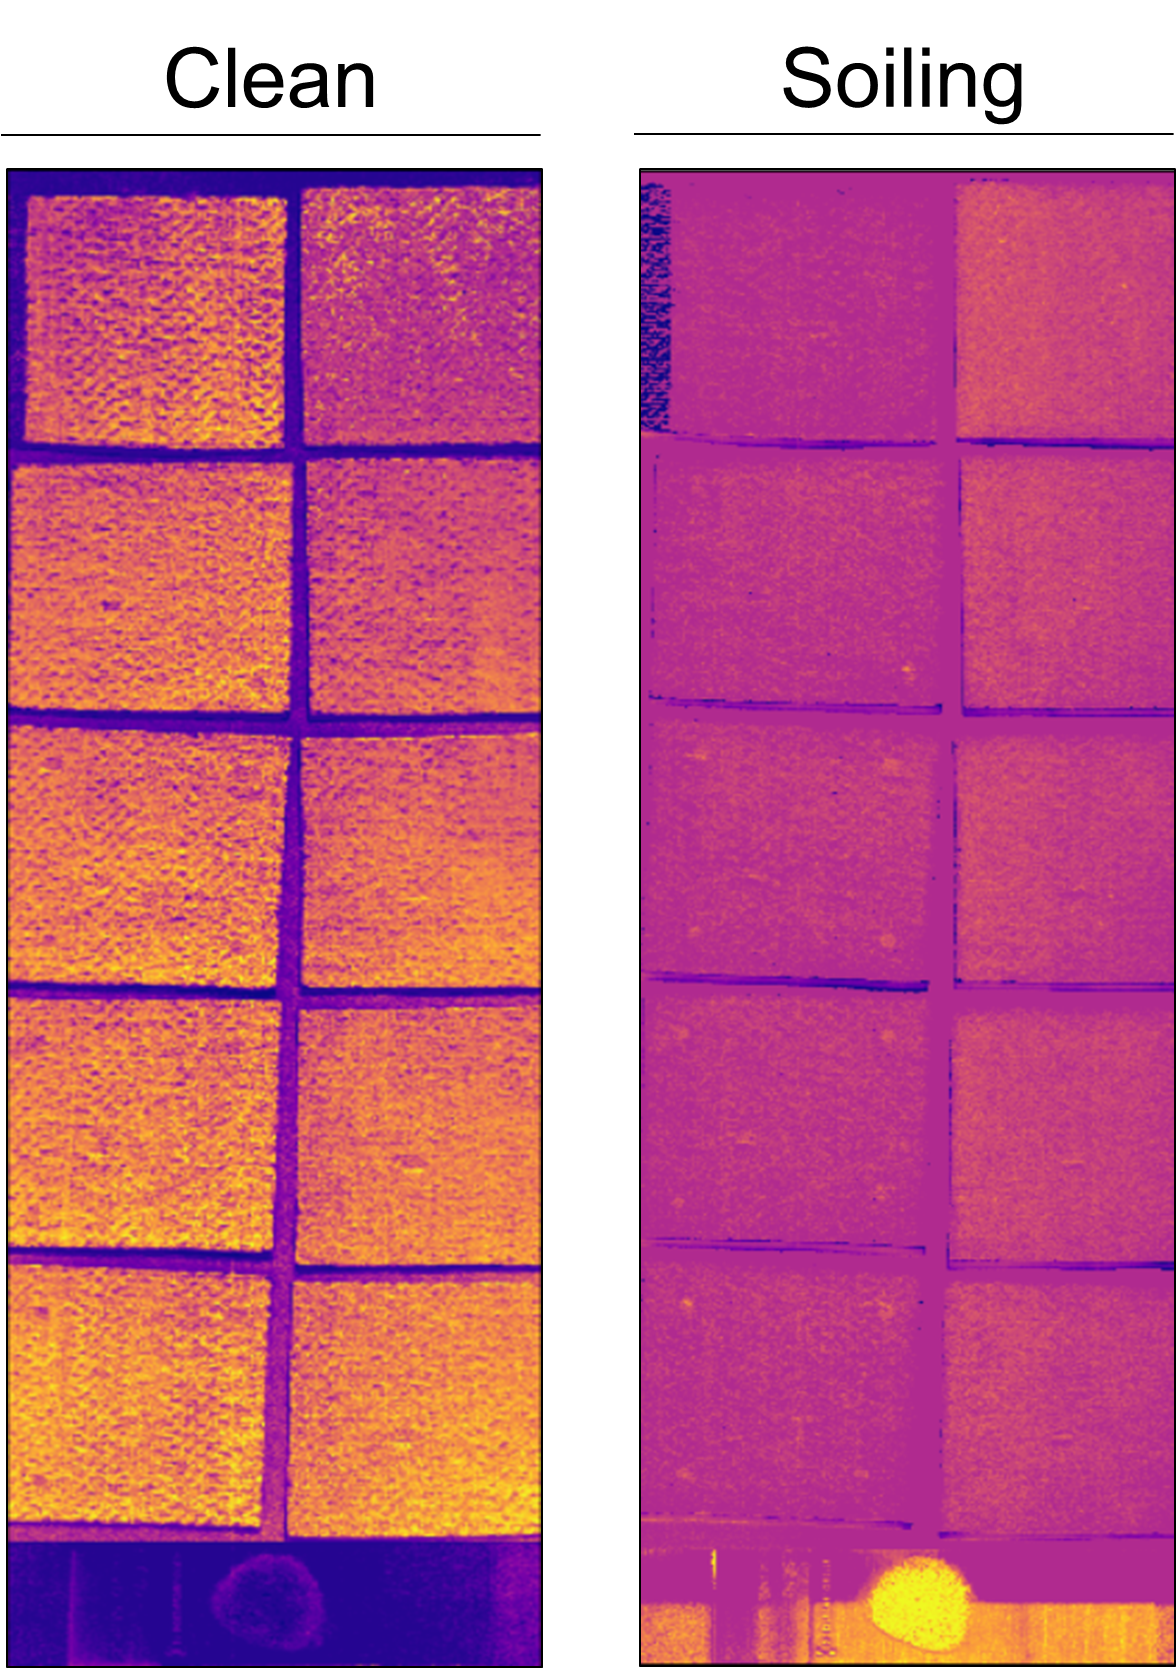

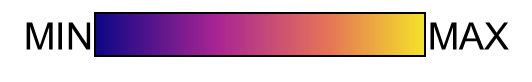

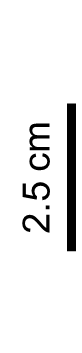


CLEANED AREAS

SOILED AREAS

**Figure S2.** spectral maps for cleaned (left) and soiled (right) areas on the mock-up surfaces after treatment. Unsoiled and soiled controls are found topmost left and right, respectively, in each map. Both maps feature spray cleaned mock-ups on the left column, and mock-ups cleaned by pre-sprayed gel, on the right column. In each column, mock-ups are placed in descending order according to cleaning solution: deionised water, adjusted water, citric acid/NaOH, and citric acid/NH4OH. A soiling sample is placed at the very bottom of each map for reference purposes.

1.1.2. supervised unmixing • swir range


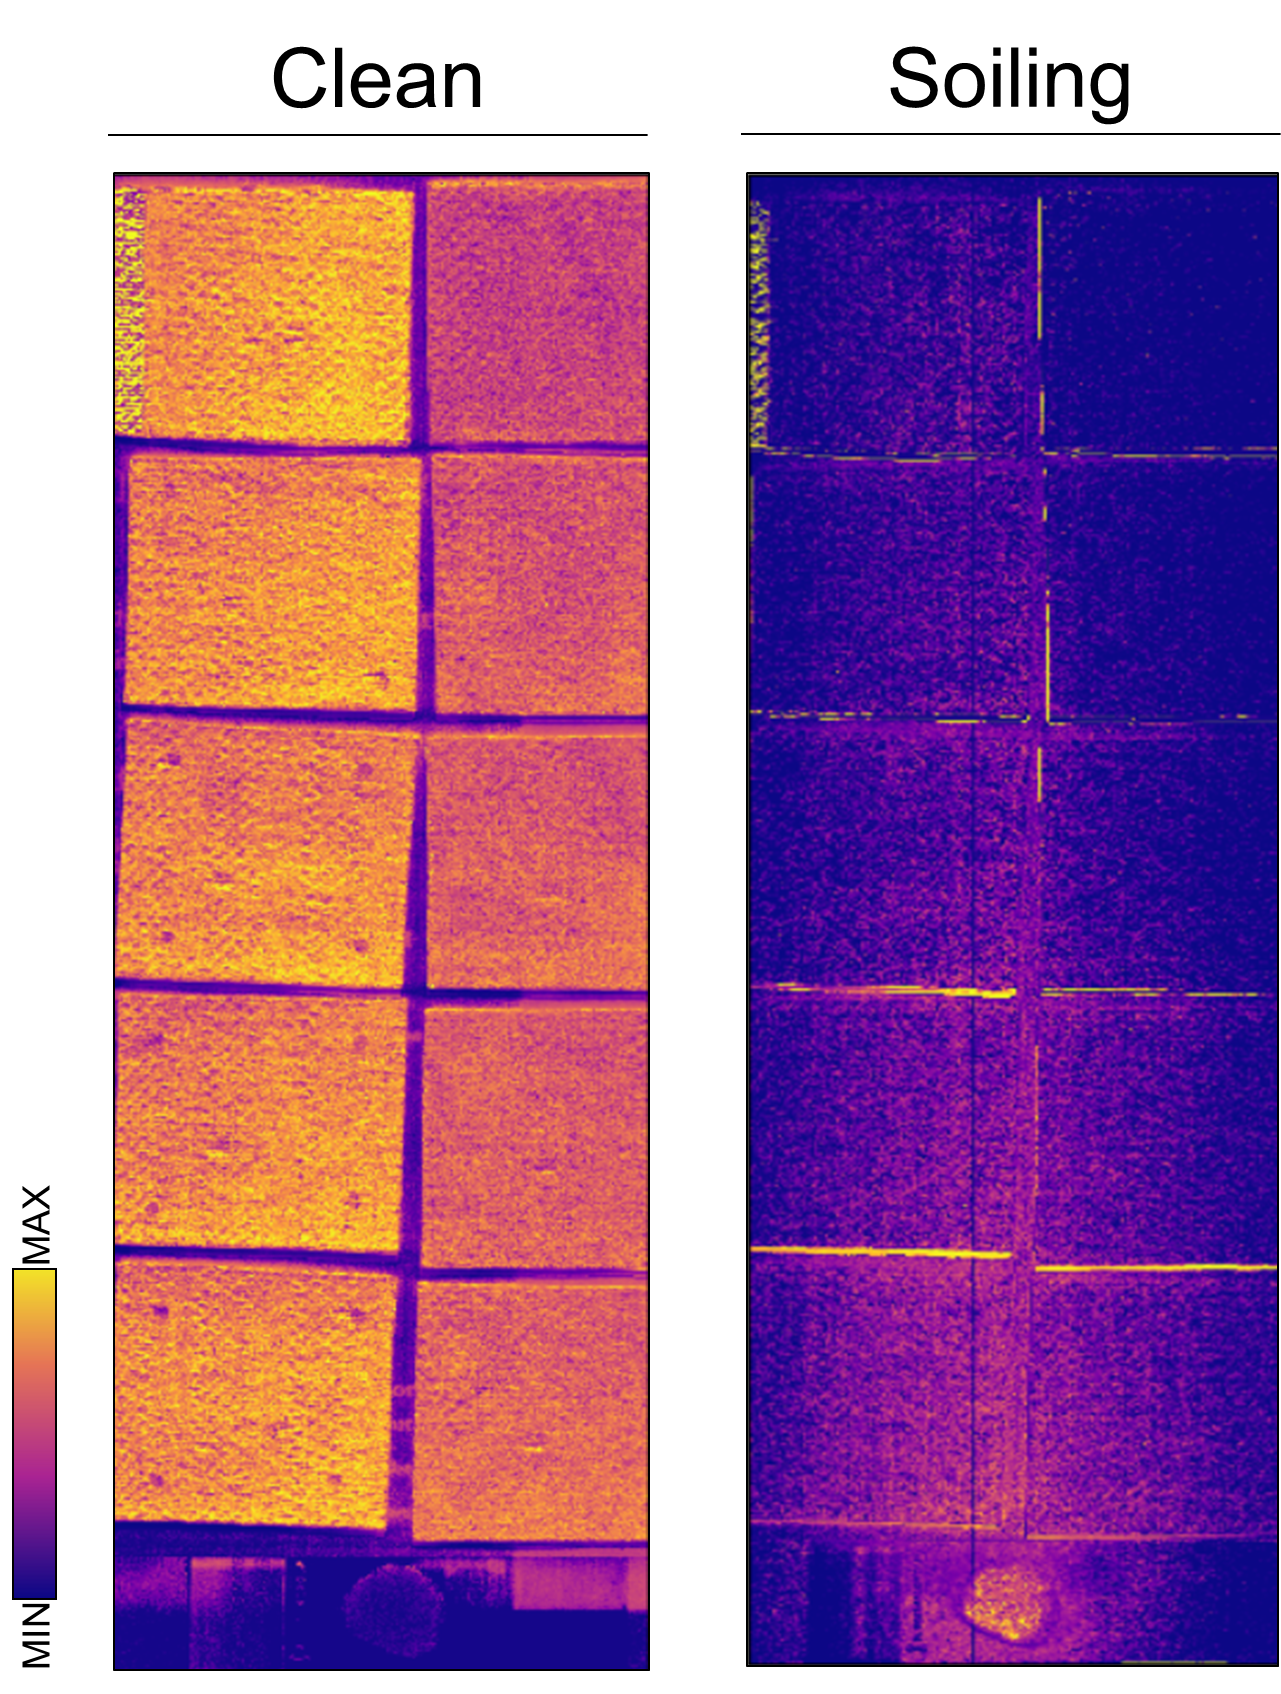

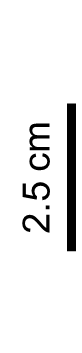


CLEANED AREAS

SOILED AREAS

**Figure S3. spectral maps for cleaned (left) and soiled (right) areas on the mock-up surfaces after treatment.** Unsoiled and soiled controls are found topmost left and right, respectively, in each map. Both maps feature spray cleaned mock-ups on the left column, and mock-ups cleaned by pre-sprayed gel, on the right column. In each column, mock-ups are placed in descending order according to cleaning solution: deionised water, adjusted water, citric acid/NaOH, and citric acid/NH4OH. A soiling sample is placed at the very bottom of each map for reference purposes.

1.2. half-chalk ground

1.2.1. supervised unmixing • vnir range


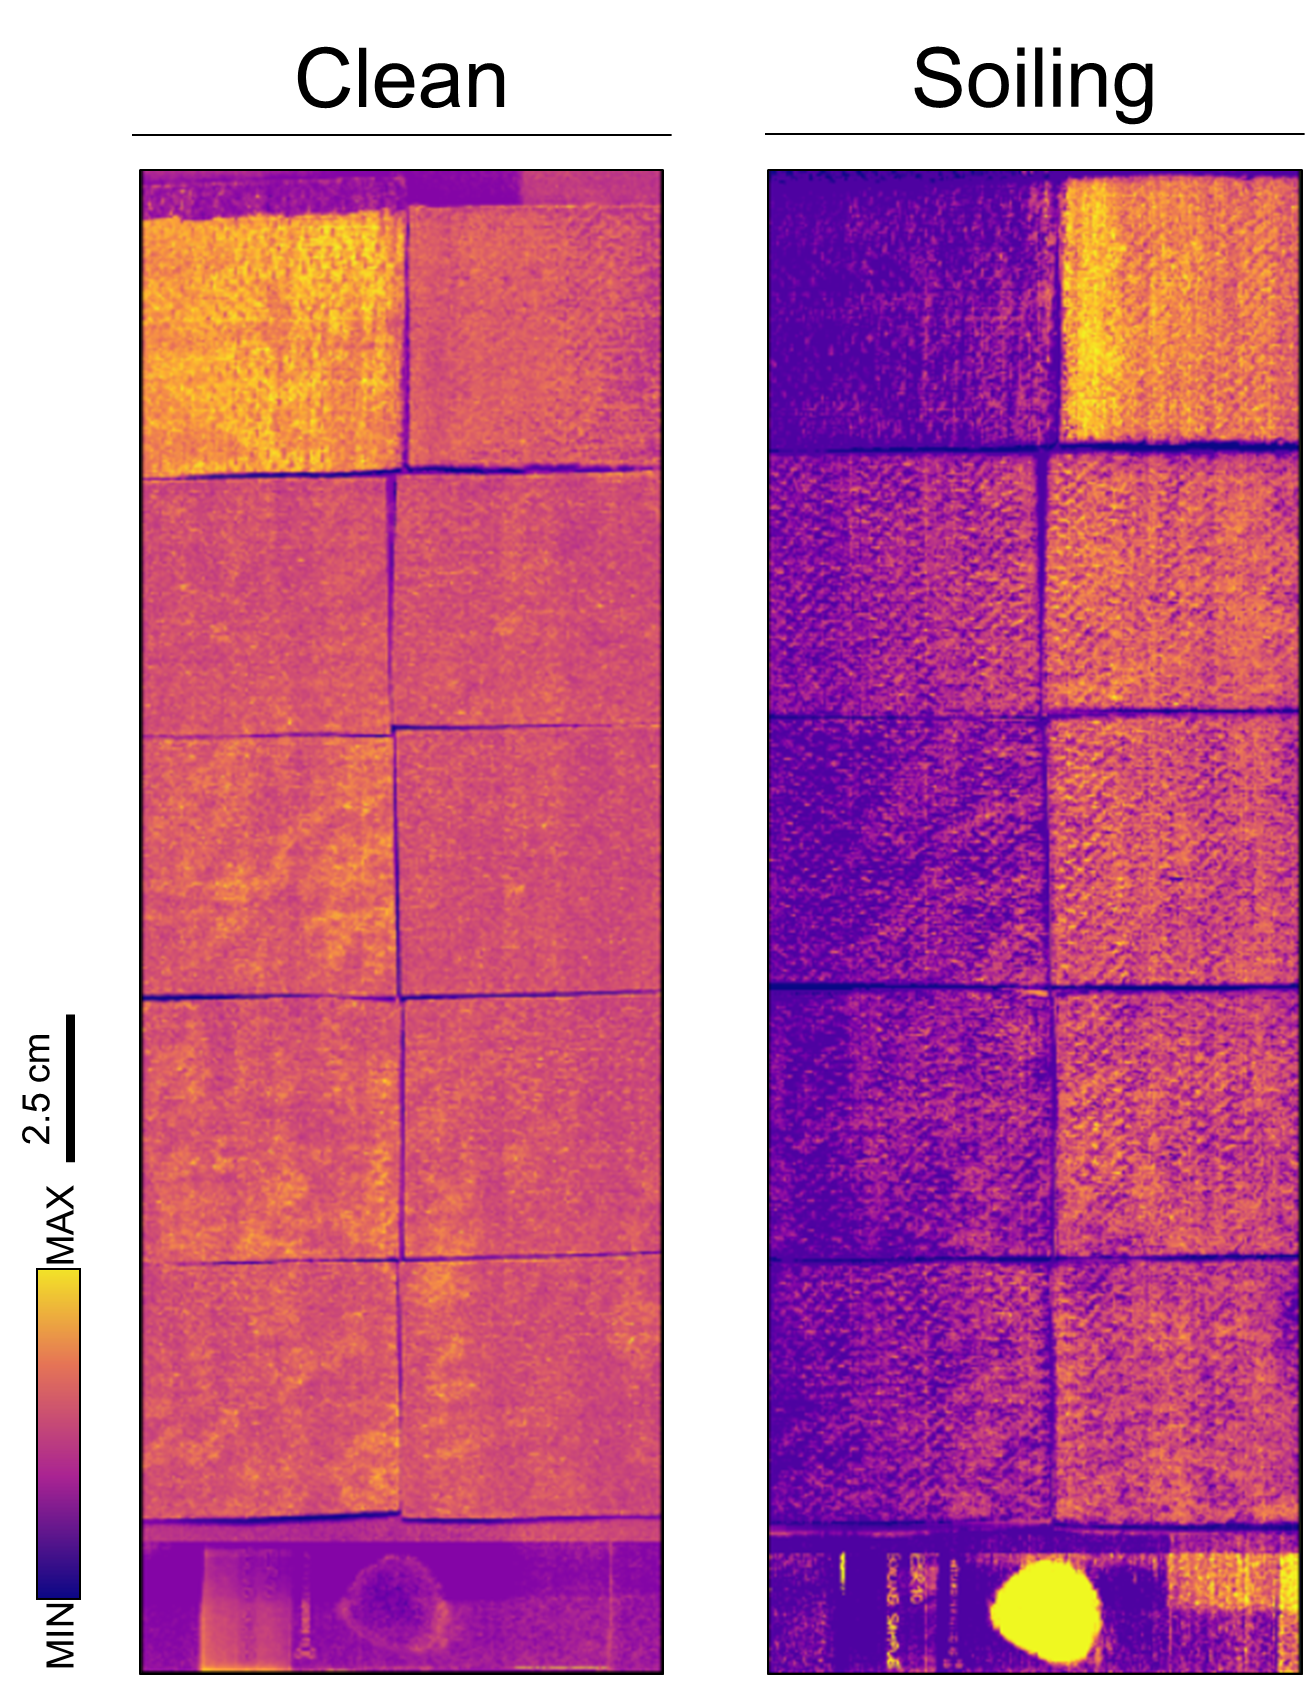


SOILED AREAS

CLEANED AREAS

**Figure S4.** spectral maps for cleaned (left) and soiled (right) areas on the mock-up surfaces after treatment. Unsoiled and soiled controls are found topmost left and right, respectively, in each map. Both maps feature spray cleaned mock-ups on the left column, and mock-ups cleaned by pre-sprayed gel, on the right column. In each column, mock-ups are placed in descending order according to cleaning solution: deionised water, adjusted water, citric acid/NaOH, and citric acid/NH4OH. A soiling sample is placed at the very bottom of each map for reference purposes.

1.2.2. supervised unmixing • swir range


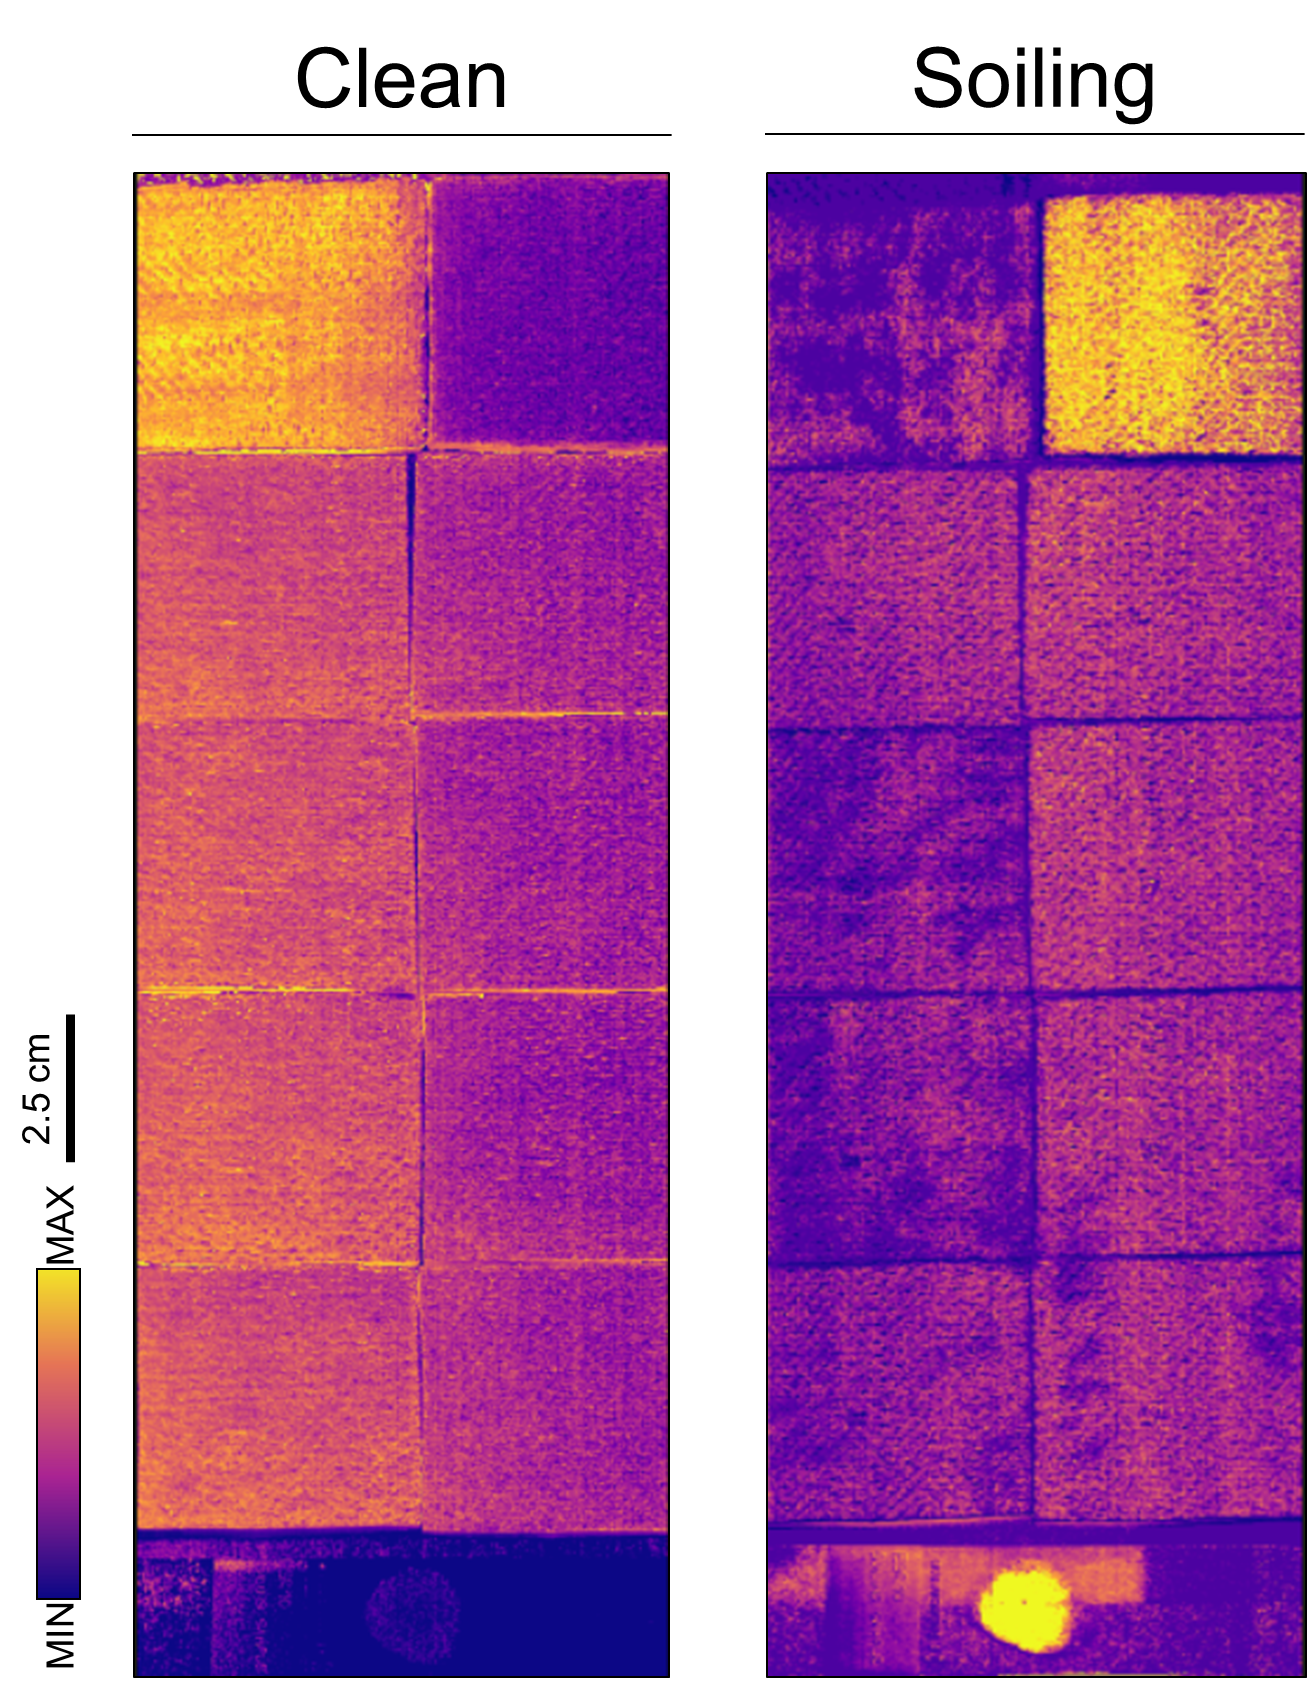


SOILED AREAS

CLEANED AREAS

**Figure S5: spectral maps for cleaned (left) and soiled (right) areas on the mock-up surfaces after treatment.** Unsoiled and soiled controls are found topmost left and right, respectively, in each map. Both maps feature spray cleaned mock-ups on the left column, and mock-ups cleaned by pre-sprayed gel, on the right column. In each column, mock-ups are placed in descending order according to cleaning solution: deionised water, adjusted water, citric acid/NaOH, and citric acid/NH4OH. A soiling sample is placed at the very bottom of each map for reference purposes.

1.3. chromium oxide green in linseed oil

1.3.1. supervised unmixing • vnir range


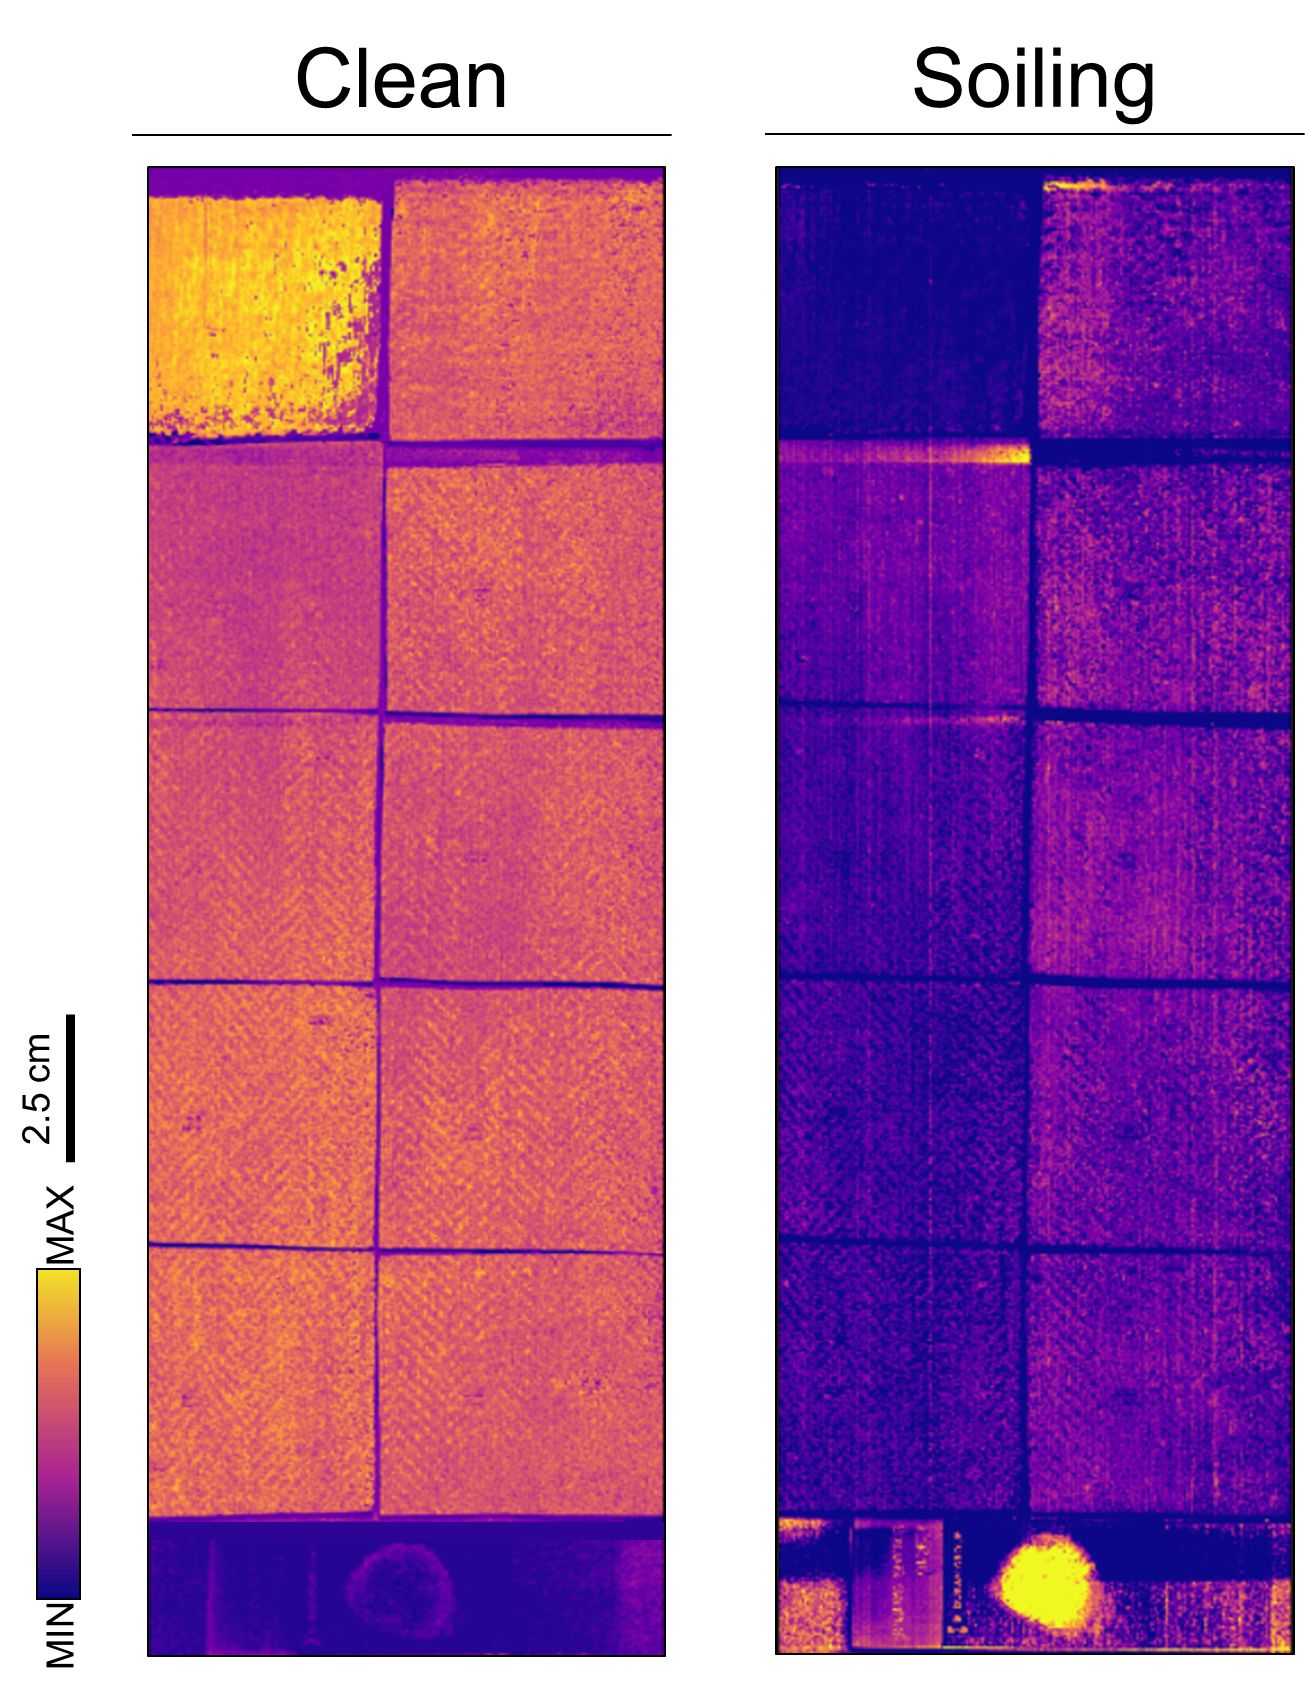


SOILED AREAS

CLEANED AREAS

**Figure S6: spectral maps for cleaned (left) and soiled (right) areas on the mock-up surfaces after treatment.** Unsoiled and soiled controls are found topmost left and right, respectively, in each map. Both maps feature spray cleaned mock-ups on the left column, and mock-ups cleaned by pre-sprayed gel, on the right column. In each column, mock-ups are placed in descending order according to cleaning solution: deionised water, adjusted water, citric acid/NaOH, and citric acid/NH4OH. A soiling sample is placed at the very bottom of each map for reference purposes.

1.3.2. supervised unmixing • swir range


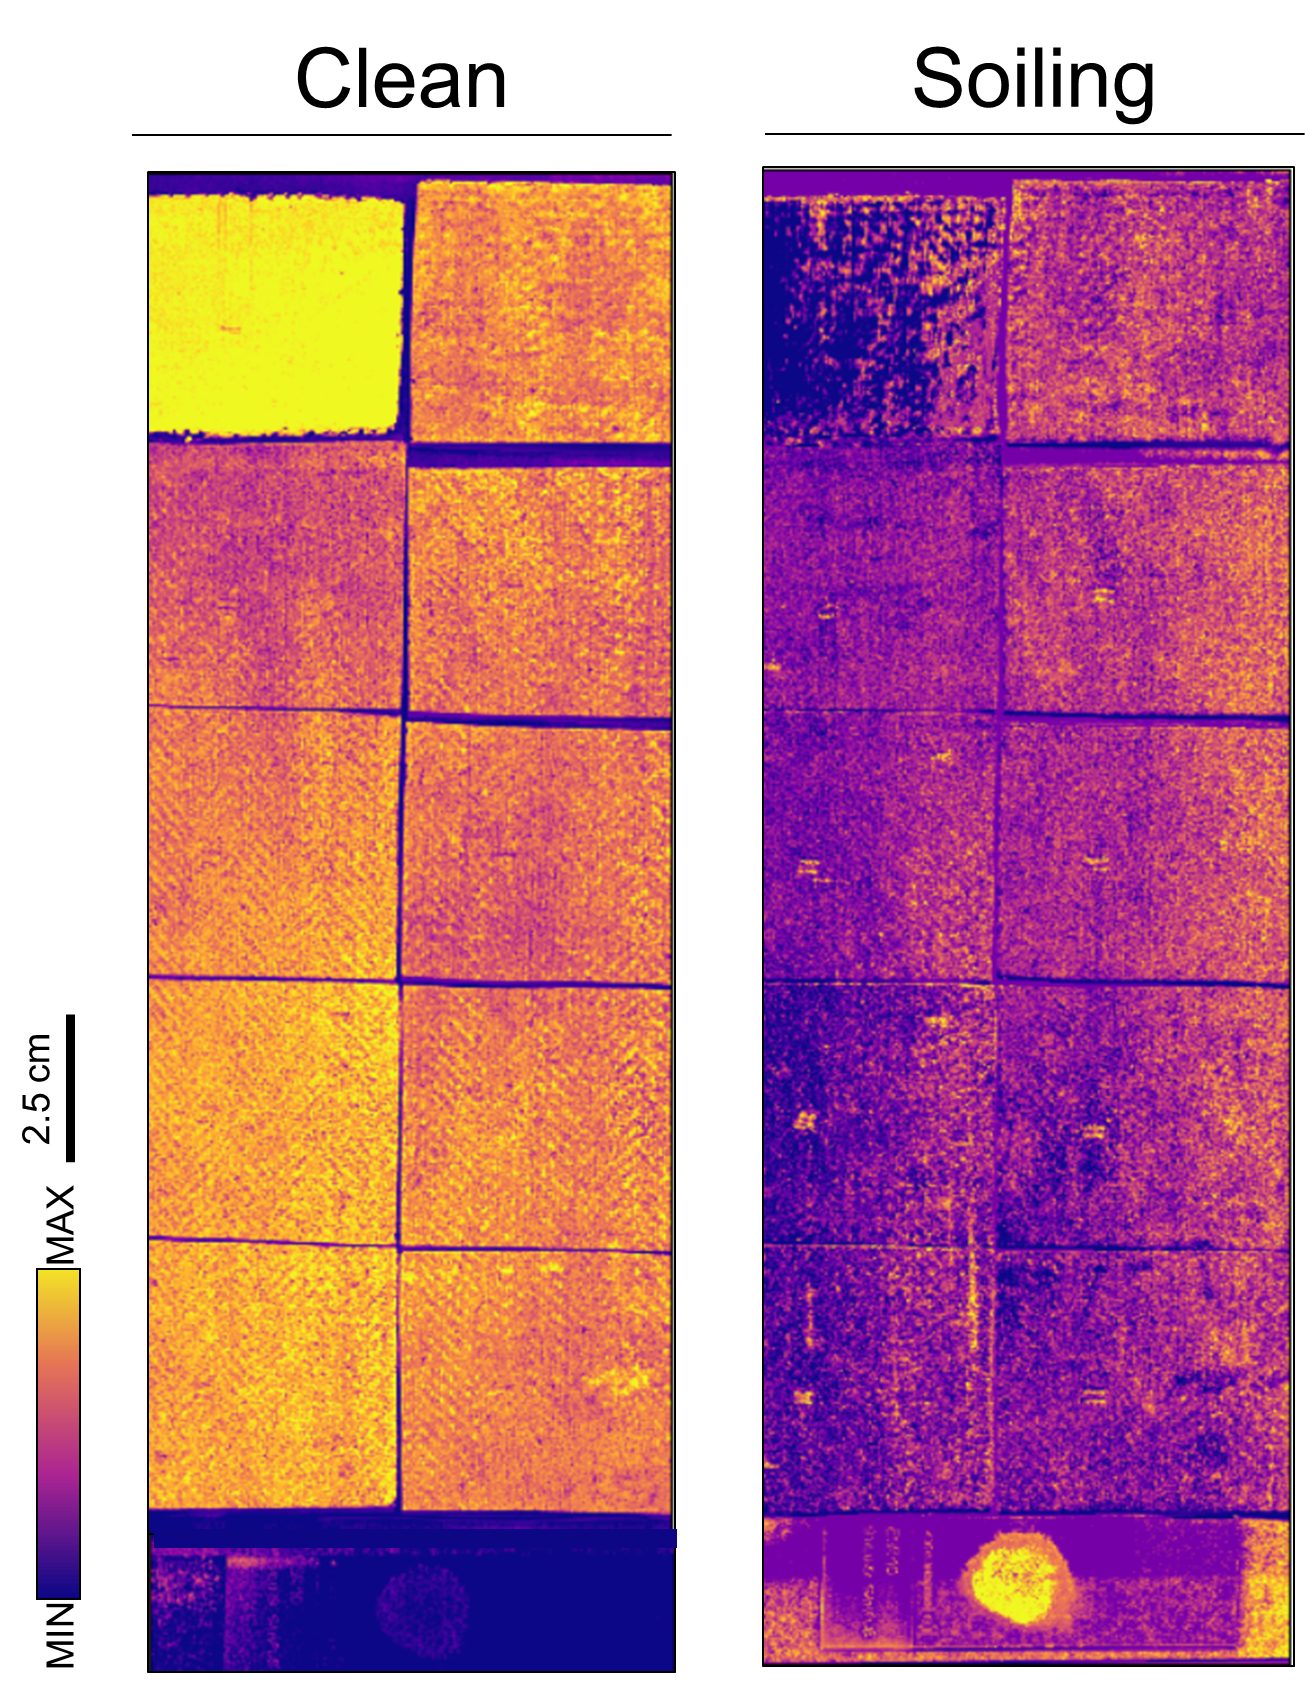


CLEANED AREAS

SOILED AREAS

**Figure S7: spectral maps for cleaned (left) and soiled (right) areas on the mock-up surfaces after treatment.** Unsoiled and soiled controls are found topmost left and right, respectively, in each map. Both maps feature spray cleaned mock-ups on the left column, and mock-ups cleaned by pre-sprayed gel, on the right column. In each column, mock-ups are placed in descending order according to cleaning solution: deionised water, adjusted water, citric acid/NaOH, and citric acid/NH4OH. A soiling sample is placed at the very bottom of each map for reference purposes.

1.4. chalk-glue ground

1.4.1. unsupervised unmixing • vnir range


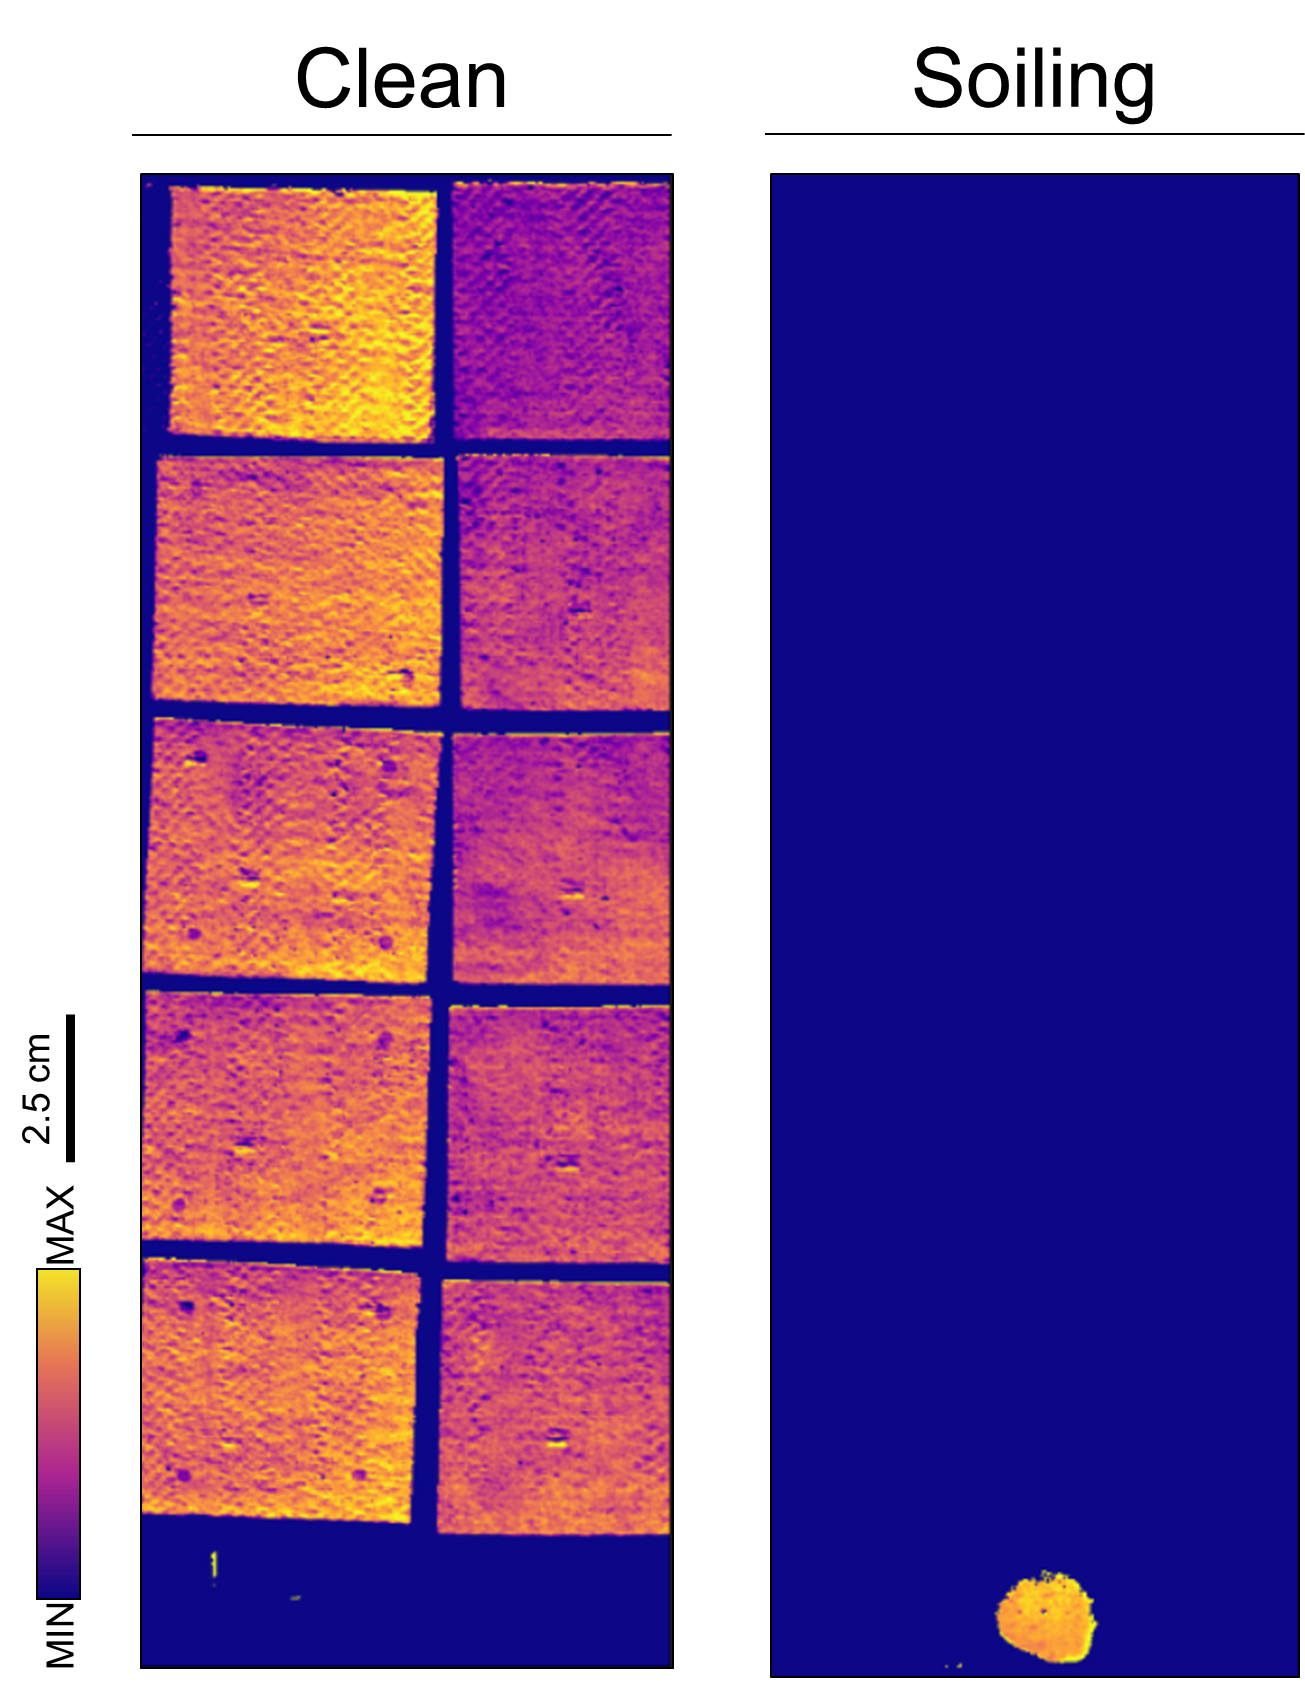


CLEANED AREAS

SOILED AREAS

**Figure S8:** spectral maps for cleaned (left) and soiled (right) areas on the mock-up surfaces after treatment. Unsoiled and soiled controls are found topmost left and right, respectively, in each map. Both maps feature spray cleaned mock-ups on the left column, and mock-ups cleaned by pre-sprayed gel, on the right column. In each column, mock-ups are placed in descending order according to cleaning solution: deionised water, adjusted water, citric acid/NaOH, and citric acid/NH4OH. A soiling sample is placed at the very bottom of each map for reference purposes.

1.4.2. unsupervised unmixing • swir range


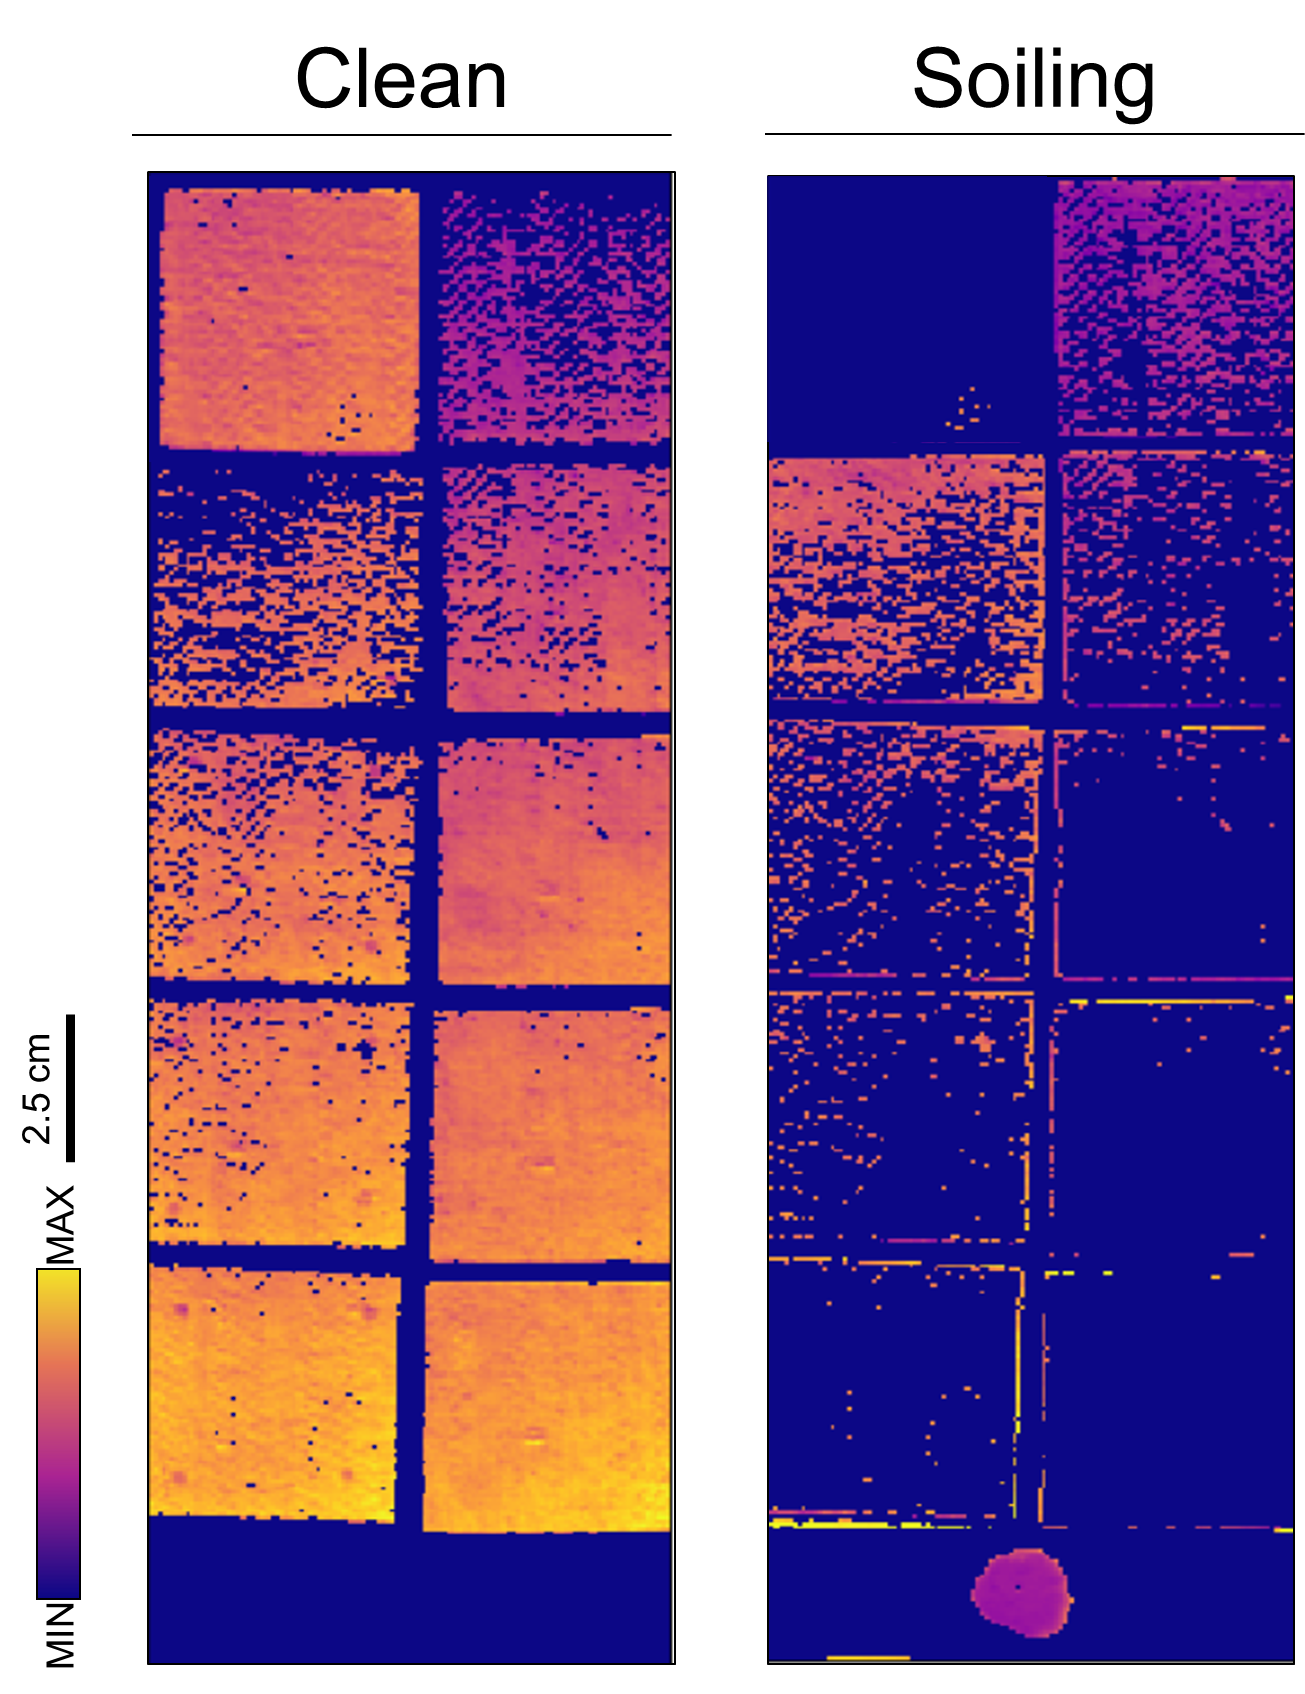


SOILED AREAS

CLEANED AREAS

**Figure S9: spectral maps for cleaned (left) and soiled (right) areas on the mock-up surfaces after treatment.** Unsoiled and soiled controls are found topmost left and right, respectively, in each map. Both maps feature spray cleaned mock-ups on the left column, and mock-ups cleaned by pre-sprayed gel, on the right column. In each column, mock-ups are placed in descending order according to cleaning solution: deionised water, adjusted water, citric acid/NaOH, and citric acid/NH4OH. A soiling sample is placed at the very bottom of each map for reference purposes.

1.5. half-chalk ground

1.5.1. unsupervised unmixing • vnir range


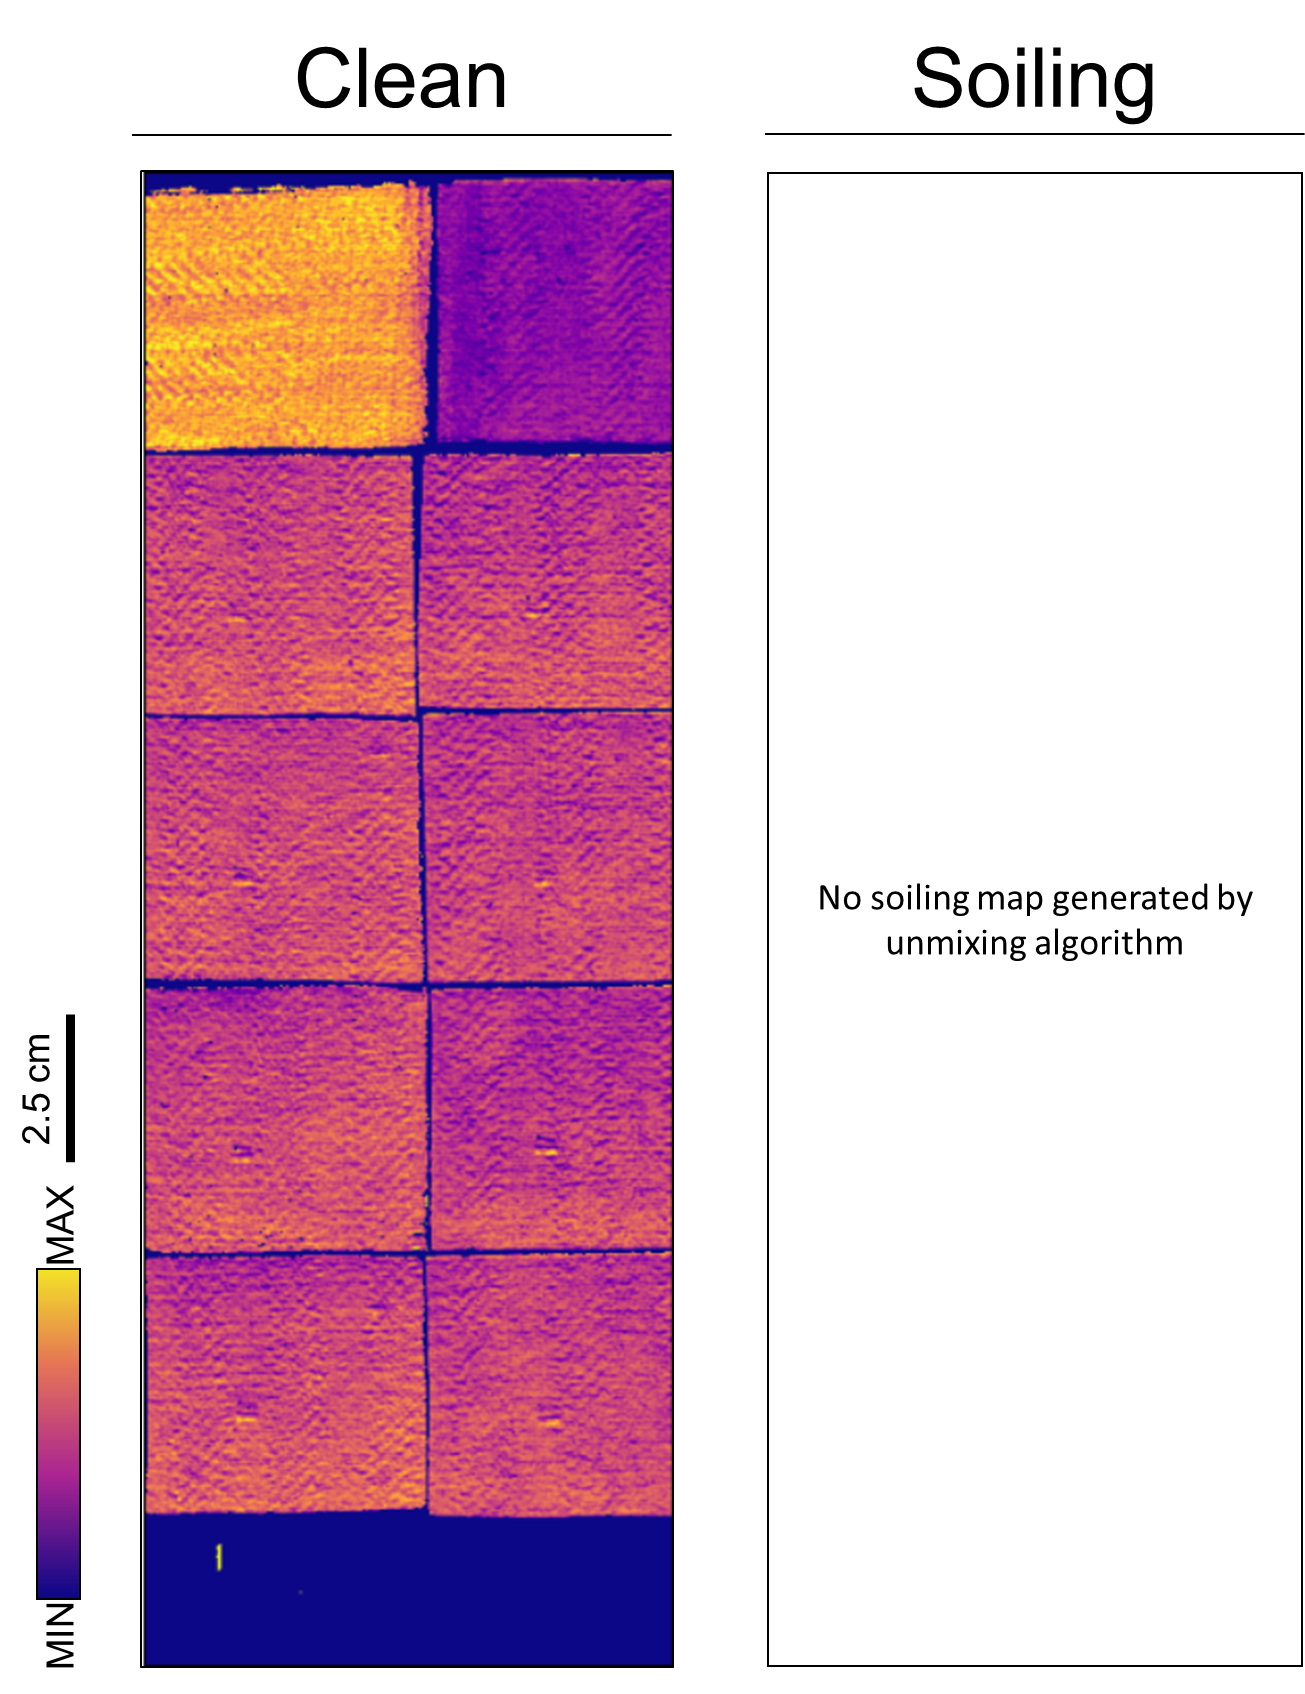


CLEANED AREAS

SOILED AREAS

**Figure S10.** spectral maps for cleaned (left) and soiled (right) areas on the mock-up surfaces after treatment. Unsoiled and soiled controls are found topmost left and right, respectively, in each map. Both maps feature spray cleaned mock-ups on the left column, and mock-ups cleaned by pre-sprayed gel, on the right column. In each column, mock-ups are placed in descending order according to cleaning solution: deionised water, adjusted water, citric acid/NaOH, and citric acid/NH4OH. A soiling sample is placed at the very bottom of each map for reference purposes.

1.5.2. unsupervised unmixing • swir range


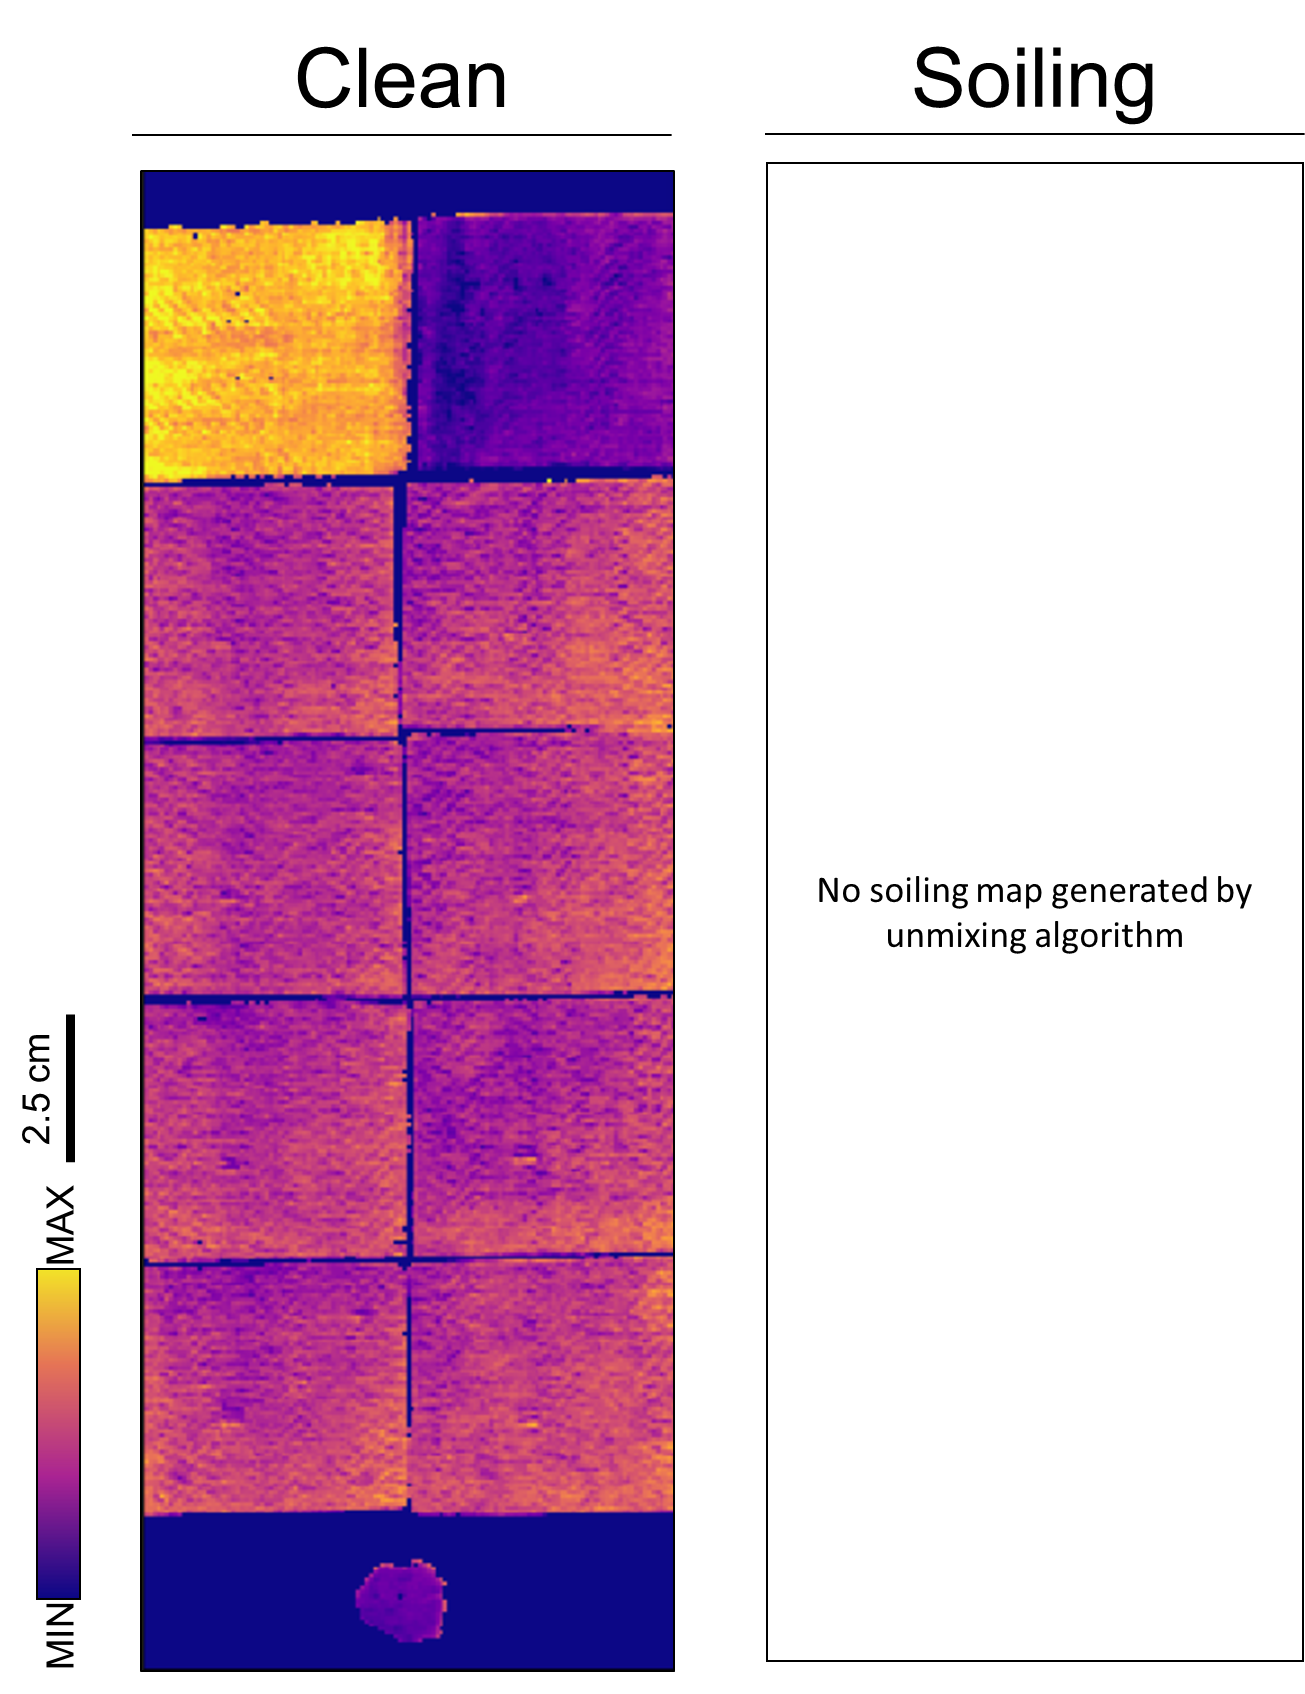


CLEANED AREAS

SOILED AREAS

**Figure S11: spectral maps for cleaned (left) and soiled (right) areas on the mock-up surfaces after treatment.** Unsoiled and soiled controls are found topmost left and right, respectively, in each map. Both maps feature spray cleaned mock-ups on the left column, and mock-ups cleaned by pre-sprayed gel, on the right column. In each column, mock-ups are placed in descending order according to cleaning solution: deionised water, adjusted water, citric acid/NaOH, and citric acid/NH4OH. A soiling sample is placed at the very bottom of each map for reference purposes.

1.6. chromium oxide green in linseed oil

1.6.1. unsupervised unmixing • vnir range

CLEANED AREAS

SOILED AREAS


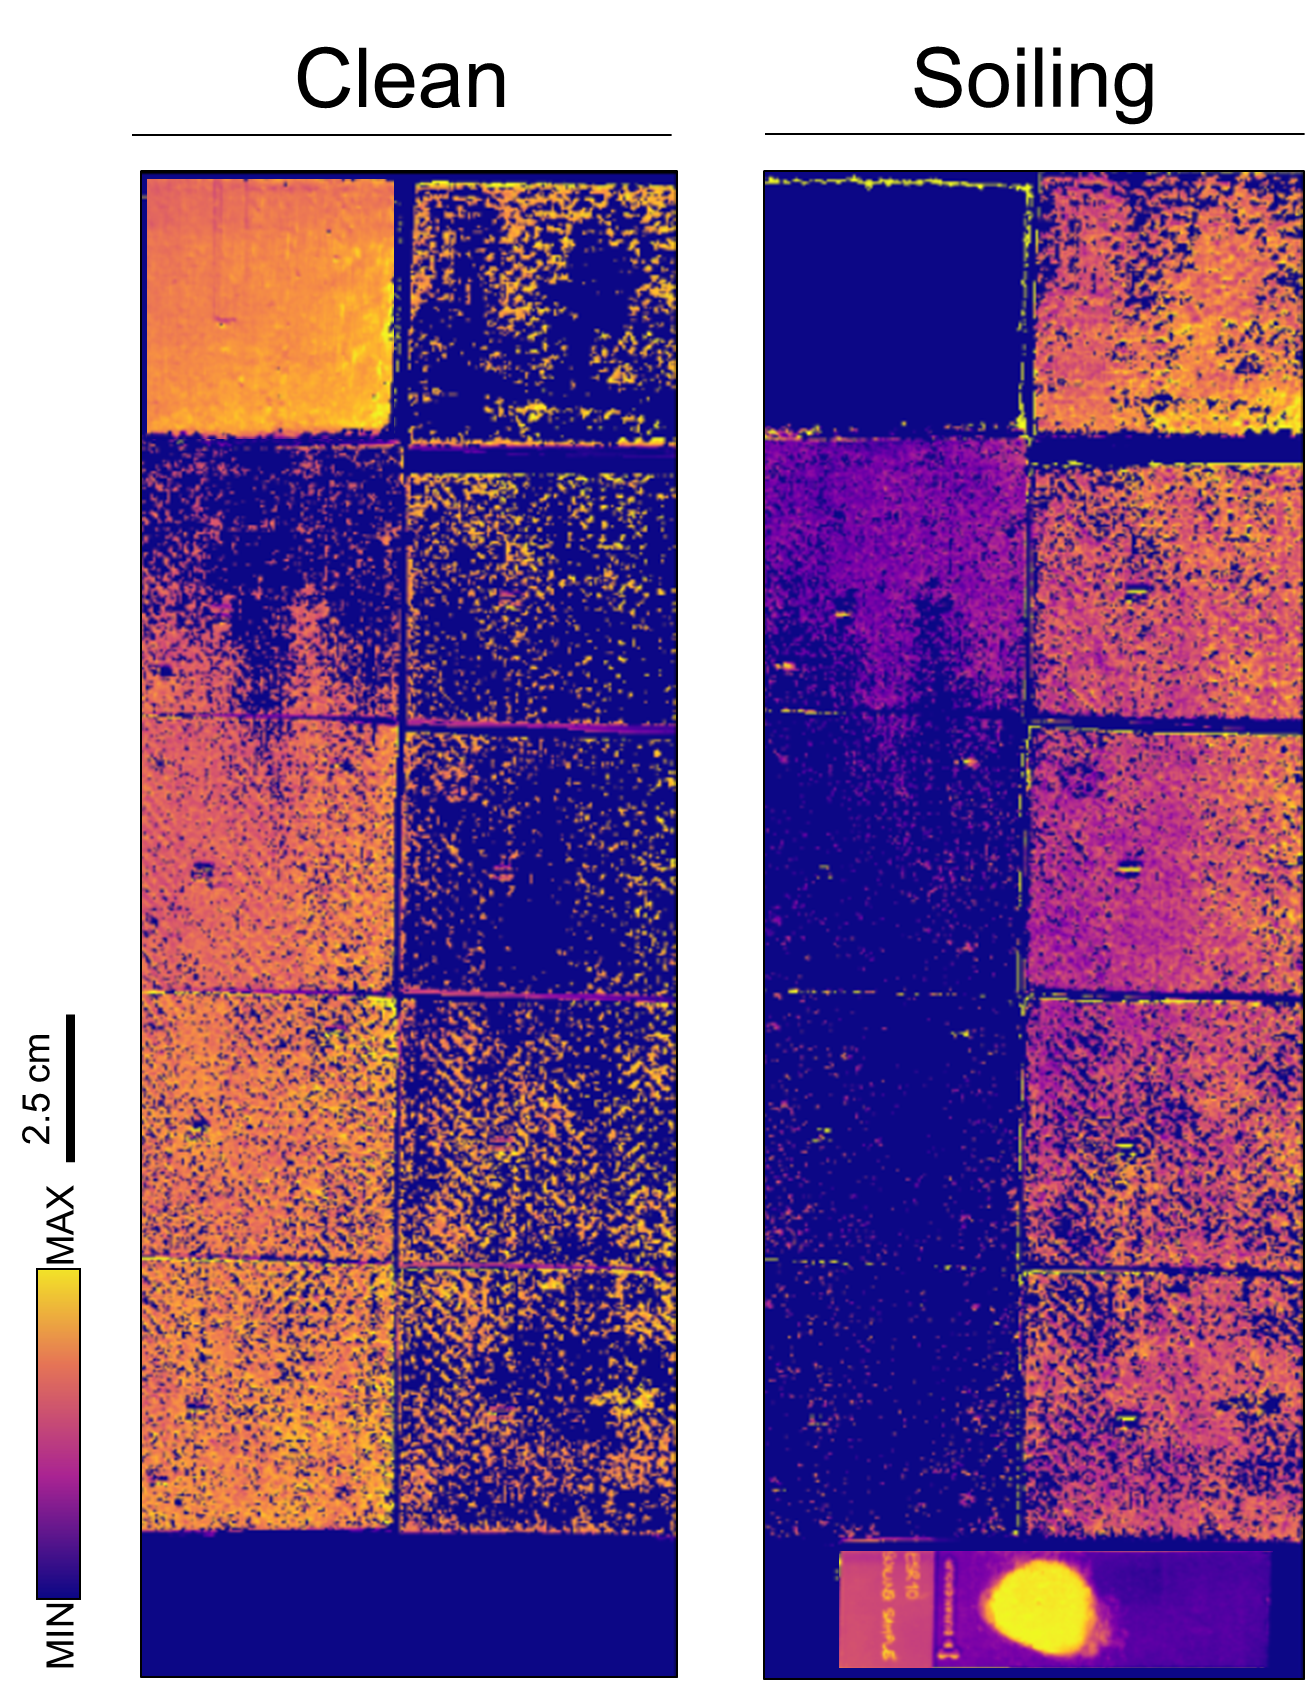


**Figure S12.** spectral maps for cleaned (left) and soiled (right) areas on the mock-up surfaces after treatment. Unsoiled and soiled controls are found topmost left and right, respectively, in each map. Both maps feature spray cleaned mock-ups on the left column, and mock-ups cleaned by pre-sprayed gel, on the right column. In each column, mock-ups are placed in descending order according to cleaning solution: deionised water, adjusted water, citric acid/NaOH, and citric acid/NH4OH. A soiling sample is placed at the very bottom of each map for reference purposes.

1.6.2. unsupervised unmixing • swir range


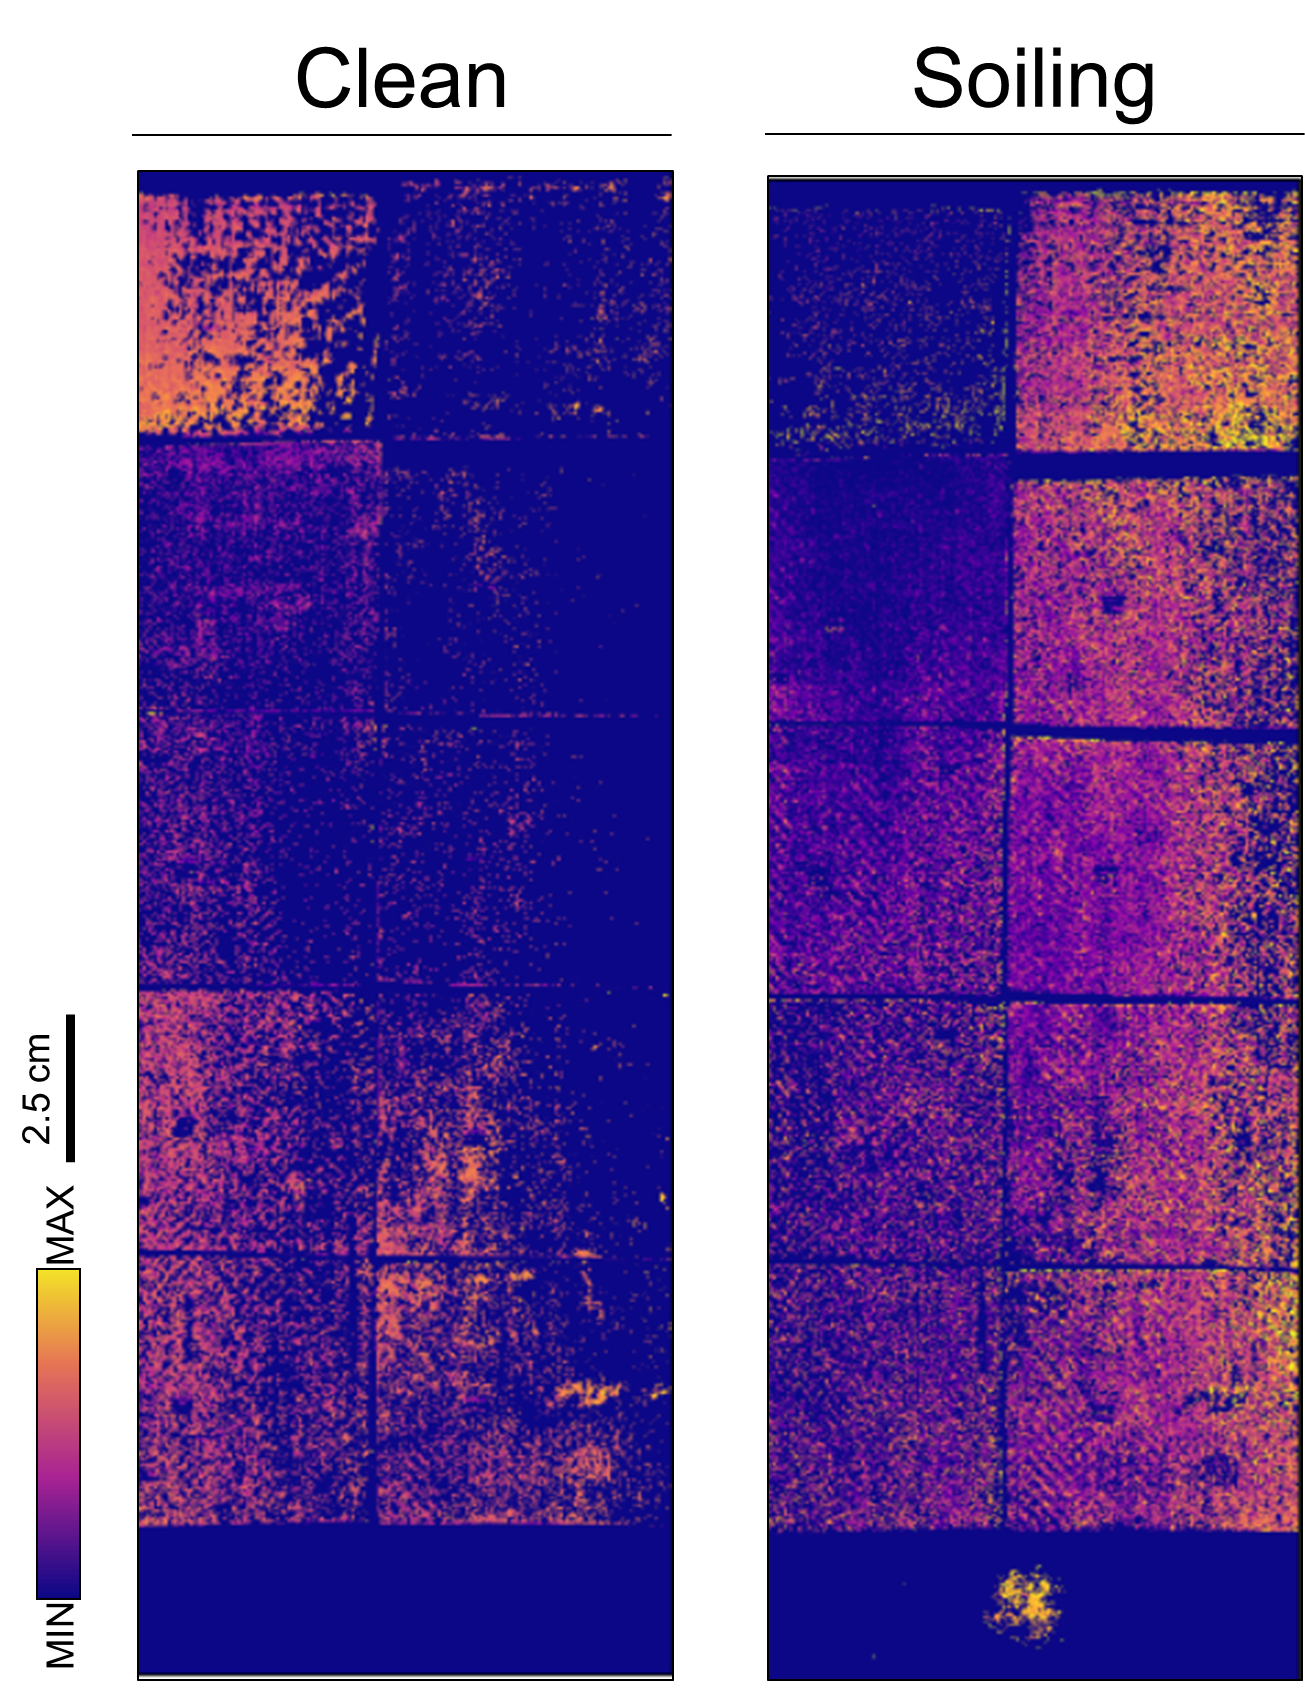


CLEANED AREAS

SOILED AREAS

**Figure S13.** spectral maps for cleaned (left) and soiled (right) areas on the mock-up surfaces after treatment. Unsoiled and soiled controls are found topmost left and right, respectively, in each map. Both maps feature spray cleaned mock-ups on the left column, and mock-ups cleaned by pre-sprayed gel, on the right column. In each column, mock-ups are placed in descending order according to cleaning solution: deionised water, adjusted water, citric acid/NaOH, and citric acid/NH4OH. A soiling sample is placed at the very bottom of each map for reference purposes.

1.7. chalk-glue ground

1.7.1. ndi mapping • swir range


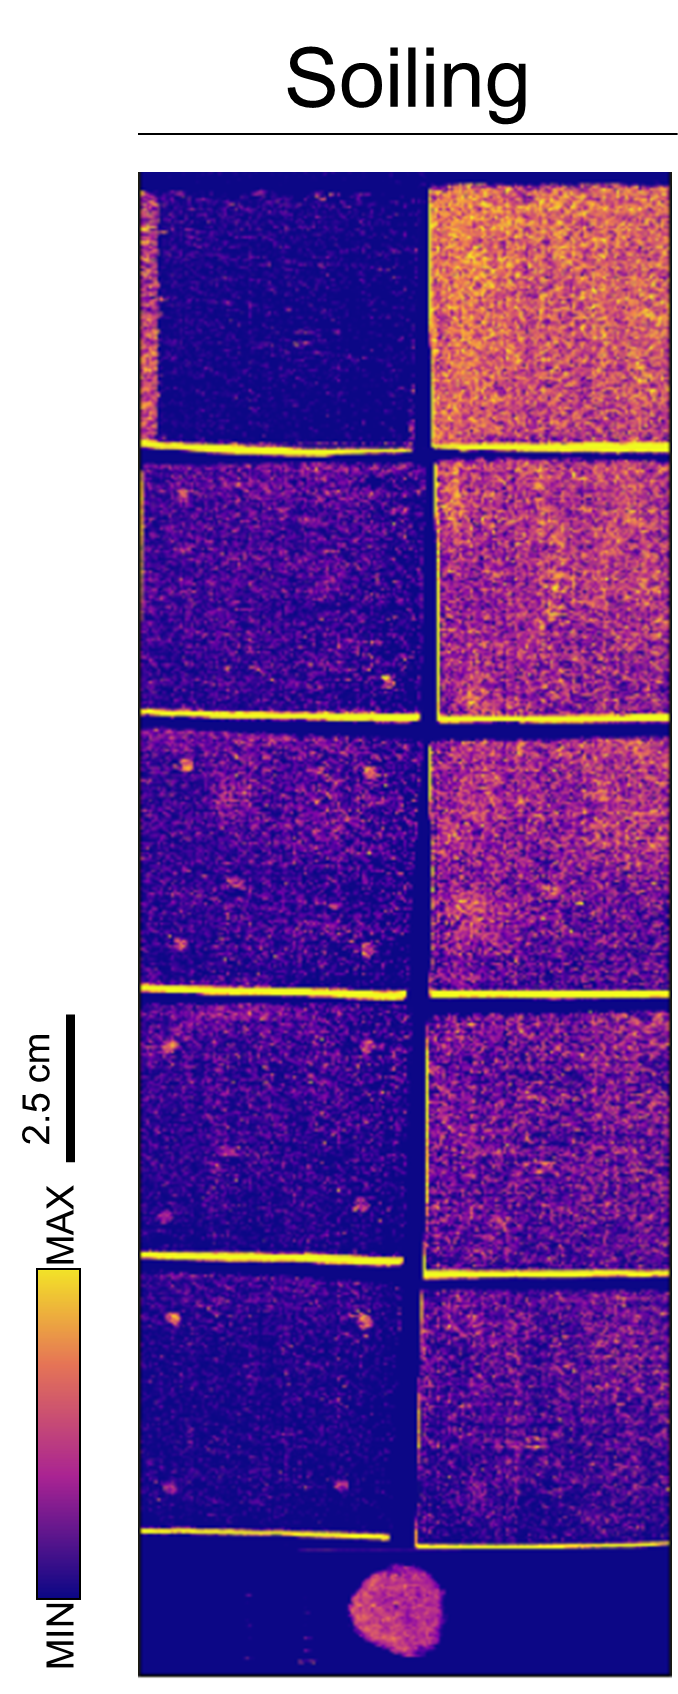


SOILED AREAS

**Figure S14.** spectral NDI map for soiled areas on the mock-up surfaces after treatment. Unsoiled and soiled controls are found topmost left and right, respectively. Spray cleaned mock-ups are found on the left column, and mock-ups cleaned by pre-sprayed gel, on the right column. In each column, mock-ups are placed in descending order according to cleaning solution: deionised water, adjusted water, citric acid/NaOH, and citric acid/NH4OH. A soiling sample is placed at the very bottom of each map for reference purposes.

1.8.half-chalk ground

1.8.1. ndi mapping • swir range


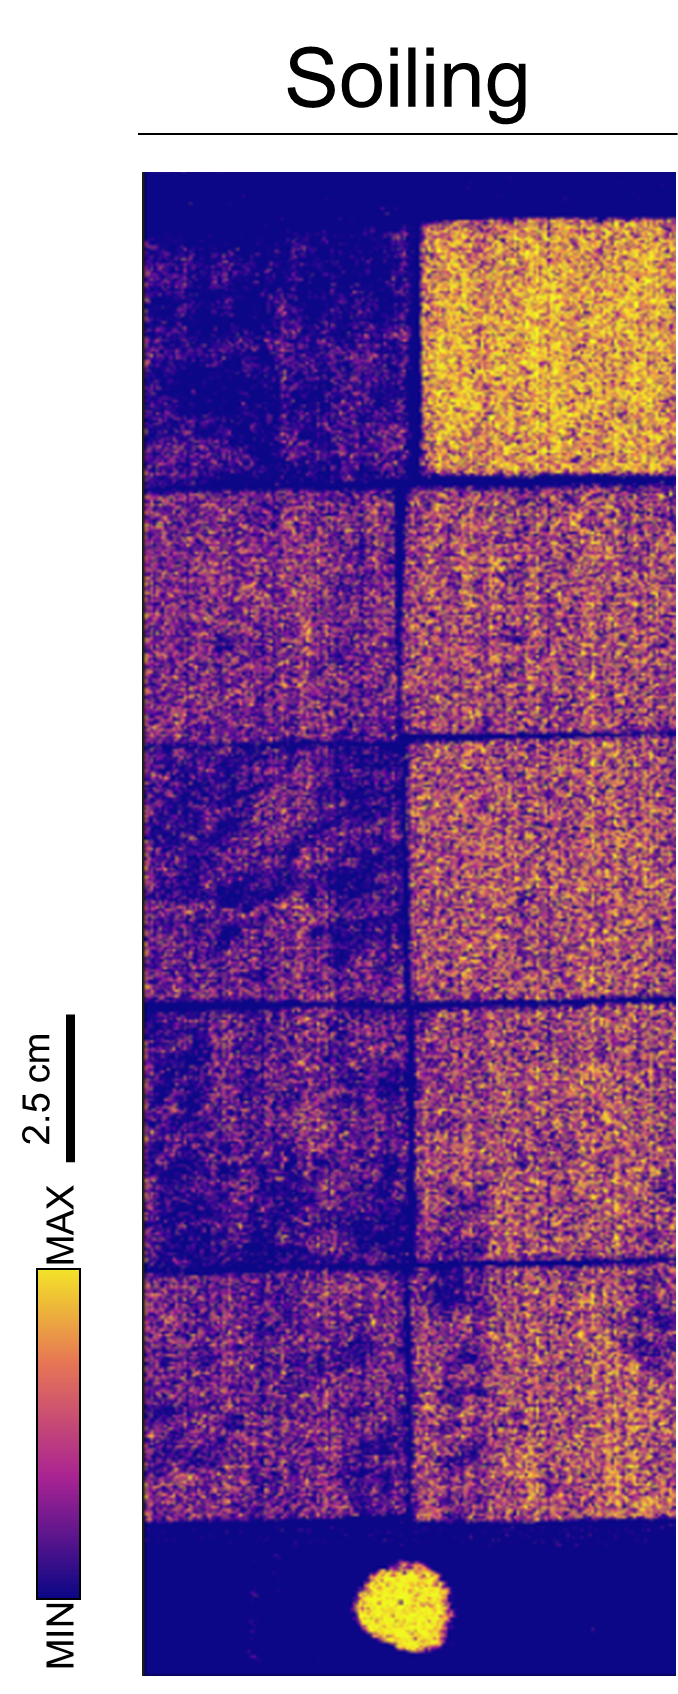


SOILED AREAS

**Figure S15.** spectral NDI map for soiled areas on the mock-up surfaces after treatment. Unsoiled and soiled controls are found topmost left and right, respectively. Spray cleaned mock-ups are found on the left column, and mock-ups cleaned by pre-sprayed gel, on the right column. In each column, mock-ups are placed in descending order according to cleaning solution: deionised water, adjusted water, citric acid/NaOH, and citric acid/NH4OH. A soiling sample is placed at the very bottom of each map for reference purposes.

1.9.chromium oxide green in linseed oil

SOILED AREAS

1.9.1. ndi mapping • swir range


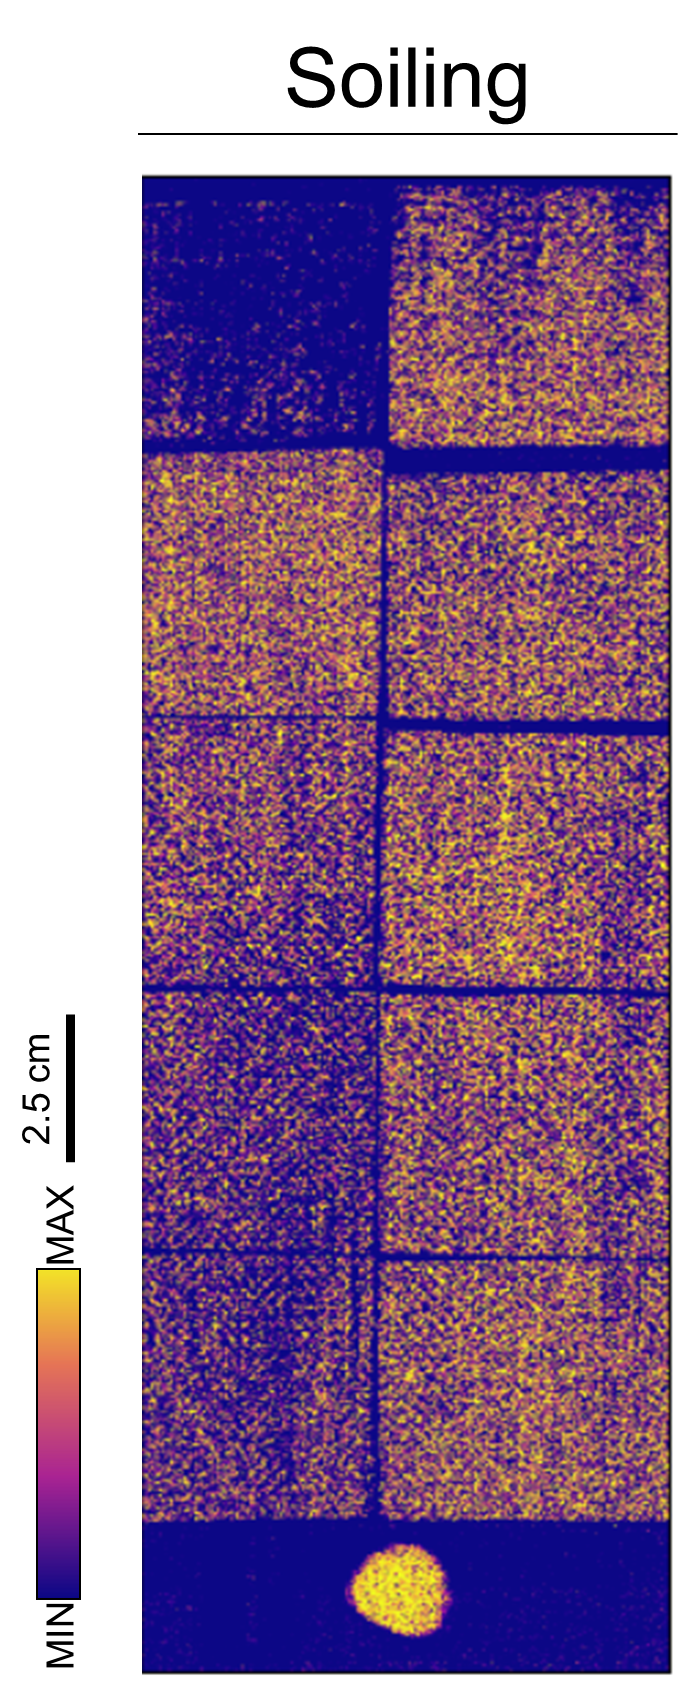


**Figure S16.** spectral NDI map for soiled areas on the mock-up surfaces after treatment. Unsoiled and soiled controls are found topmost left and right, respectively. Spray cleaned mock-ups are found on the left column, and mock-ups cleaned by pre-sprayed gel, on the right column. In each column, mock-ups are placed in descending order according to cleaning solution: deionised water, adjusted water, citric acid/NaOH, and citric acid/NH4OH. A soiling sample is placed at the very bottom of each map for reference purposes.

2. Additional Table Supporting Methodology

**Table S1.** Environmental parameters measured during agar spray tests.
